# Supplementary material for: Alternative hydrogen bond models of cellulose II and IIII based on molecular force-fields and density functional theory
Source: Springer Nature journal article supplement (doi:10.1007/s10570-015-0589-z), 2015-03-05
Supplement: MOESM5 [file 7013706]

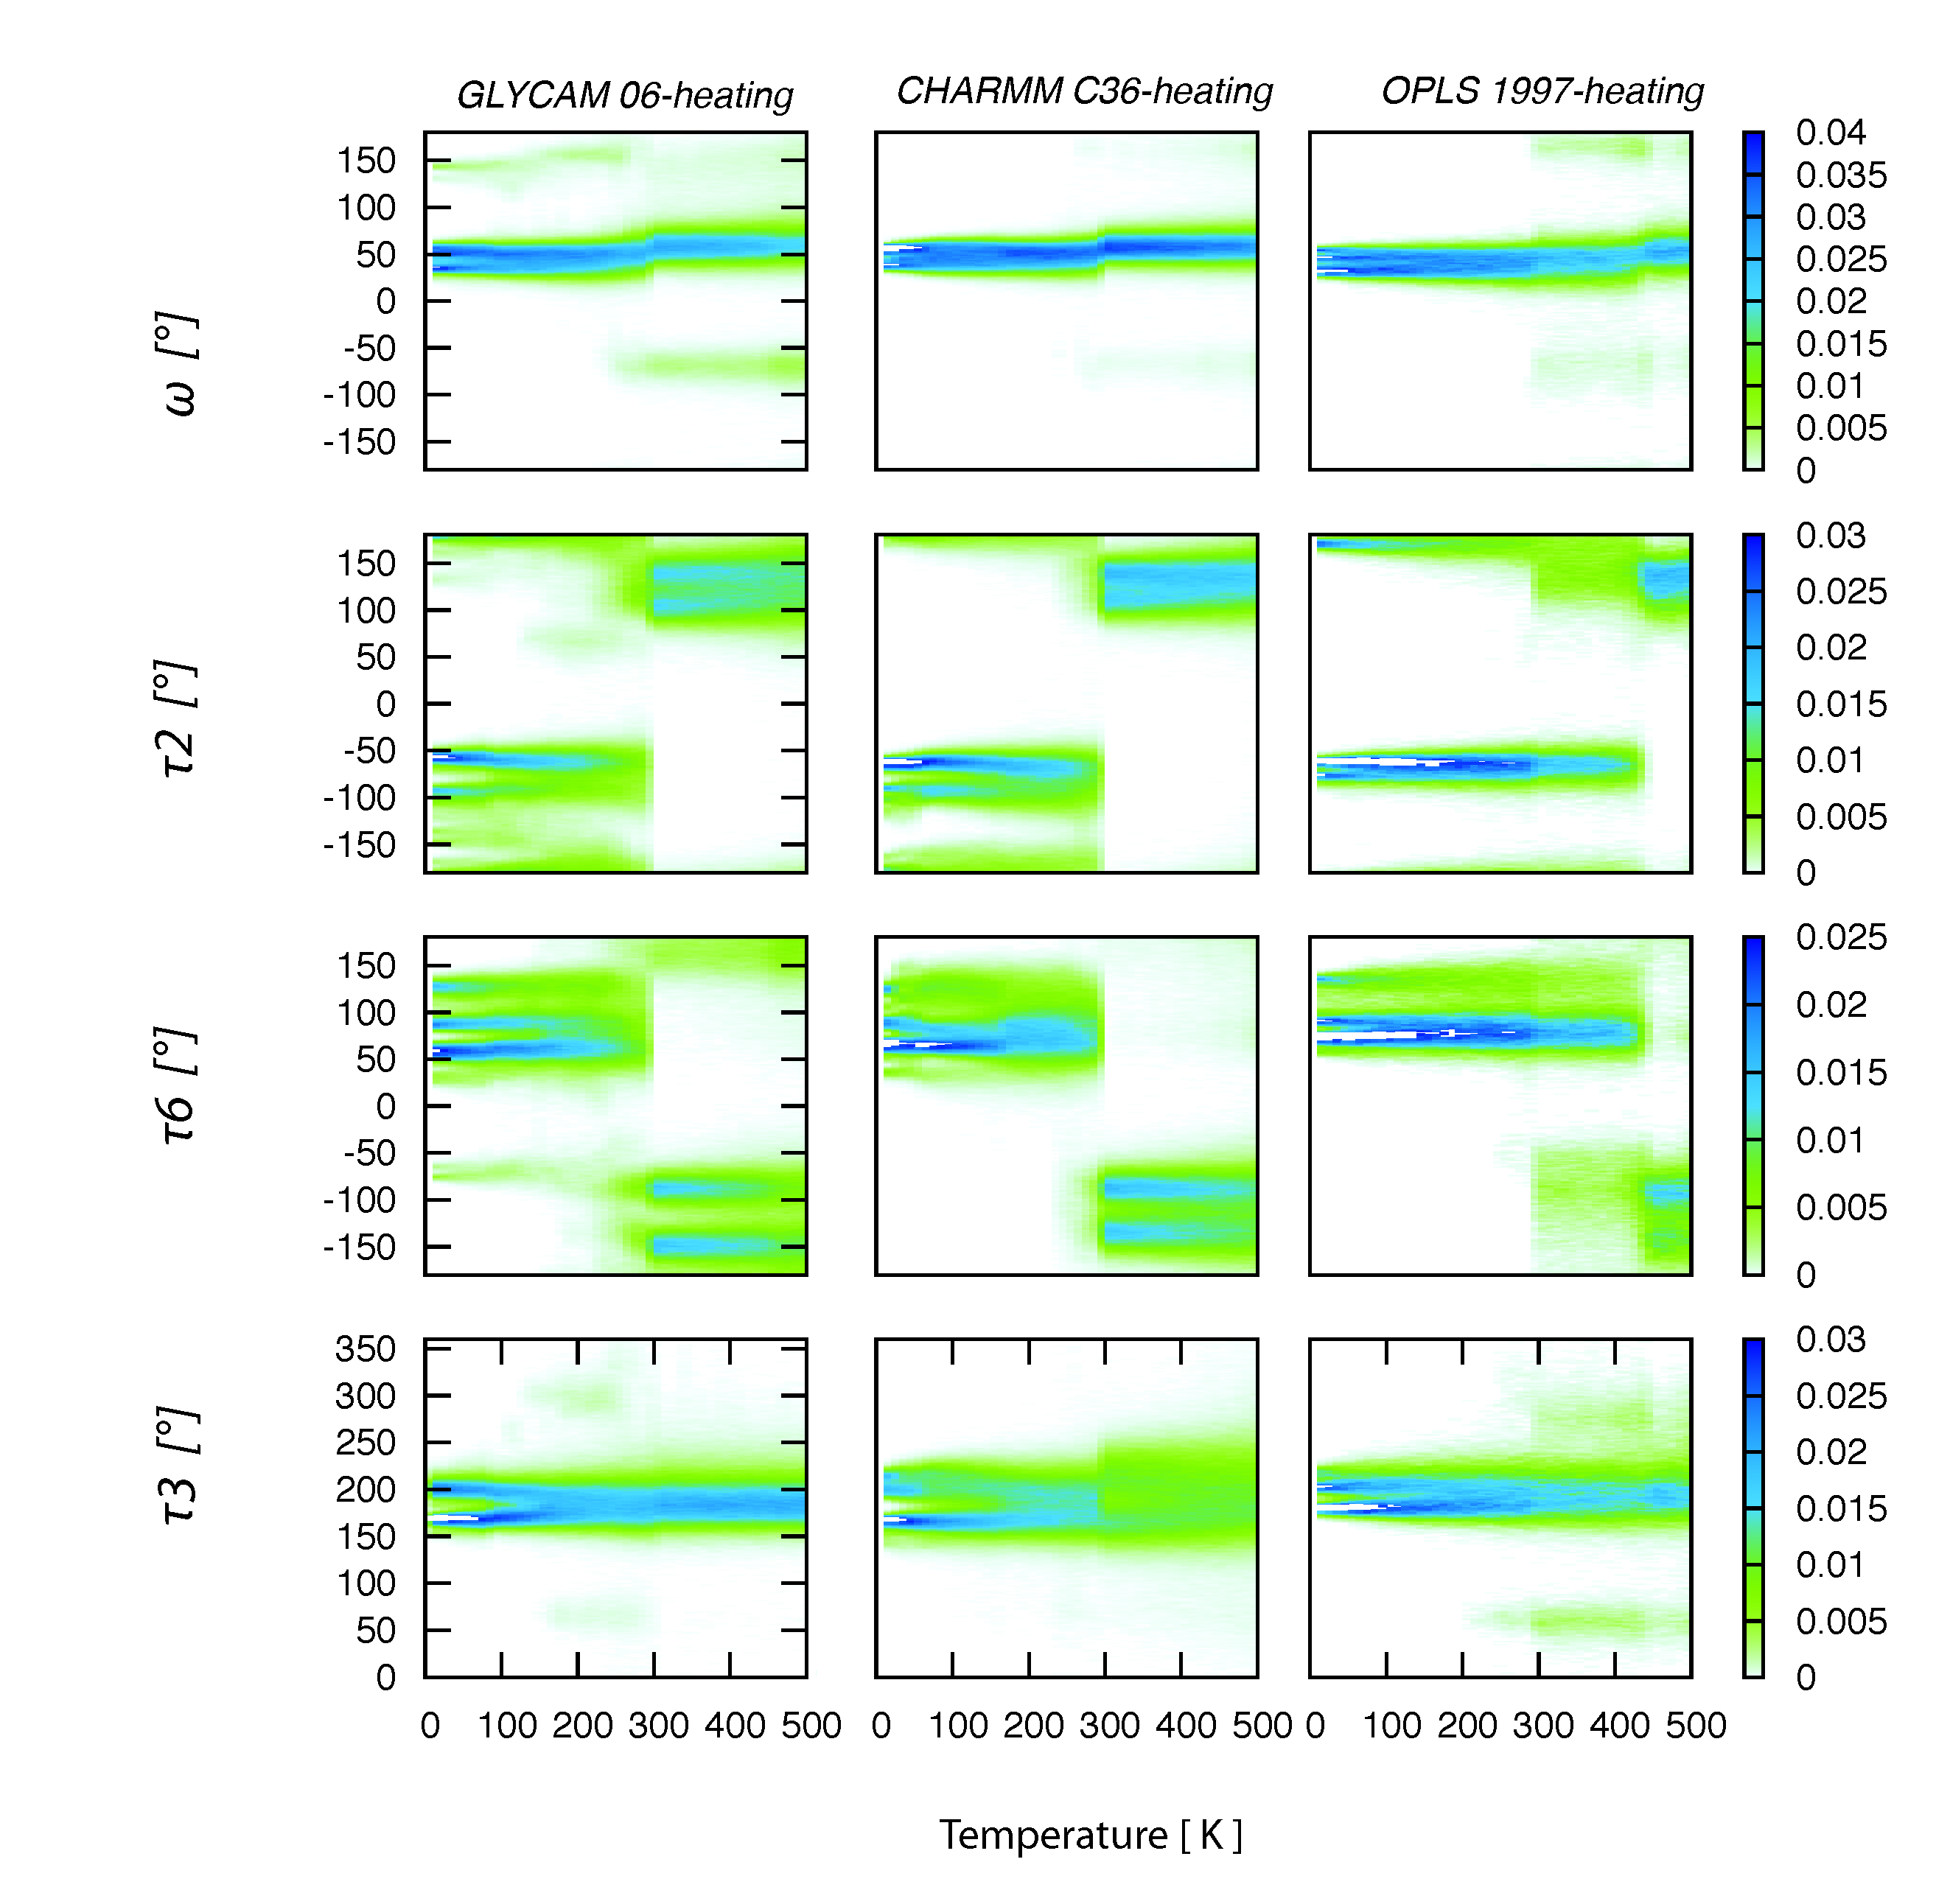


Figure S1. Distribution of dihedral angles (τ2, τ3, τ6 and ω) of cellulose II as a function of temperature during MD simulation using GLYCAM, OPLS and CHARMM force fields.

Figure S2. Unit cell parameters of cellulose II as a function of temperature using four force fields.

Figure S3: Torsional energy profile around C2-O2 bond in four carbohydrate force fields (the torsion C3-C2-O2-HO2 and H1-C2-O2-HO2 are both added to be expressed by C1-C2-O2-HO2). The energy difference between pattern A and pattern B is shown in Table S5 and S6.

Table S1: Entropy (kJ.mol-1.K-1) of cellulose II and IIII with pattern A and B using four force fields.

|  | GROMOS | CHARMM | GLYCAM | OPLS |
| --- | --- | --- | --- | --- |
| Cell II ∆SA->B (100 K) | -0.001 | -0.0046 | -0.0019 | 0.0023 |
| Cell II –T∆SA->B (100 K) | 0.1 | 0.46 | 0.19 | -0.23 |
| Cell II ∆SA->B (300 K) | 0.0025 |  |  | -0.0016 |
| Cell II –T∆SA->B (300 K) | -0.75 |  |  | 0.48 |
| Cell IIII ∆SA->B (100 K) |  | 0.0015 | 0.0024 |  |
| Cell IIII –T∆SA->B (100 K) |  | -0.45 | -0.72 |  |

Table S2. Hydrogen bond geometries and ring puckering parameters of cellulose II with hydrogen bond pattern A and B after DFT optimization

| HB Pattern A | | | | HB Pattern B | | | |
| --- | --- | --- | --- | --- | --- | --- | --- |
| D-H…A | *dH-A*  [Å] | *dD-A*  [Å] | ∠*D-H…A*  [∘] | D-H…A | *dH-A*  [Å] | *dD-A*  [Å] | ∠*D-H…A*  [∘] |
| *O3C-HO3C..O5C* | 1.83 | 2.80 | 168 | *O3C-HO3O..O5O* | 1.80 | 2.77 | 166 |
| *O3O-HO3O..O5O* | 1.89 | 2.79 | 151 | *O3O-HO3O..O5O* | 1.94 | 2.82 | 146 |
| *O3C-HO3C..O1C* | 2.47 | 2.92 | 108 | *O3C-HO3C..O1C* | 2.48 | 2.93 | 107 |
| *O3O-HO3O..O6O* | 2.29 | 3.01 | 129 | *O3O-HO3O..O6O* | 2.33 | 3.06 | 132 |
| *O2O-HO2O..O6O* | 1.54 | 2.54 | 168 | *O6O-HO6O..O2O* | 1.53 | 2.54 | 169 |
| *O6C-HO6C..O2C* | 1.51 | 2.53 | 172 | *O2C-HO2C..O6C* | 1.57 | 2.58 | 175 |
| *O6O-HO6O..O6C* | 1.60 | 2.58 | 161 | *O2O-HO2O..O2C* | 1.59 | 2.59 | 175 |
| *O2C-HO2C..O2O* | 1.58 | 2.59 | 175 | *O6C-HO6C..O6O* | 1.62 | 2.62 | 175 |
| *O3O-HO3O..O6C* | 2.59 | 3.09 | 111 | *O3O-HO3O..O6C* | 2.47 | 3.03 | 115 |
| *C3C-H3C ..O1O* | 2.44 | 3.50 | 161 | *C3C-H3C ...O1O* | 2.43 | 3.50 | 162 |
| *C6O-H6AO..O3C* | 2.28 | 3.03 | 124 | *C6O-H6AO..O3C* | 2.28 | 3.03 | 124 |
| *C5O-H5O ..O1C* | 2.27 | 3.36 | 166 | *C5O-H5O ..O1C* | 2.25 | 3.34 | 167 |
| *C2C-H2C ..O3O* | 2.59 | 3.48 | 137 | *C6C-H6BC..O2C* | 2.45 | 3.54 | 169 |

| Ring puckering | Pattern A | | Pattern B | |
| --- | --- | --- | --- | --- |
|  | Origin Chains | Center Chains | Origin Chains | Center Chains |
| Theta [∘] | 3.05 | 9.5 | 2.53 | 12.30 |

Table S3. Hydrogen bond geometries and ring puckering parameters of cellulose IIII with hydrogen bond pattern A and B after DFT optimization

| HB Pattern A | | | | HB Pattern B | | | |
| --- | --- | --- | --- | --- | --- | --- | --- |
| D-H…A | *dH-A*  [Å] | *dD-A*  [Å] | ∠*D-H…A*  [∘] | D-H…A | *dH-A*  [Å] | *dD-A*  [Å] | ∠*D-H…A*  [∘] |
| *O3-HO3...O5* | 1.96 | 2.85 | 149 | *O3-HO3...O5* | 1.99 | 2.87 | 146 |
| *O3-HO3…O6* | 2.40 | 3.15 | 132 | *O3-HO3…O6* | 2.37 | 3.14 | 135 |
| *O2-HO2…O6* | 1.50 | 2.52 | 170 | *O6-HO6…O2* | 1.53 | 2.55 | 173 |
| *O6-HO6…O2* | 1.52 | 2.53 | 168 | *O2-HO2...O6* | 1.51 | 2.53 | 173 |

| Ring puckering | Pattern A | Pattern B |
| --- | --- | --- |
| Theta [∘] | 7.61 | 9.72 |

Table S4. Optimized unit cell parameters from DFT for cellulose II and IIII (units are in angstrom and degree) and experimental values.

|  | II |  | Exp | IIII |  | Exp |
| --- | --- | --- | --- | --- | --- | --- |
|  | A | B | A | B |
| *a* | 7.832 | 7.898 | 8.10 | 4.312 | 4.238 | 4.450 |
| *b* | 8.772 | 8.748 | 9.03 | 7.600 | 7.781 | 7.850 |
| *c* | 10.34 | 10.35 | 10.31 | 10.37 | 10.34 | 10.31 |
| *α* | 90 | 90 | 90 | 90 | 90 | 90 |
| *β* | 90 | 90 | 90 | 90 | 90 | 90 |
| *γ* | 116.2 | 117.4 | 117.1 | 100.9 | 102.6 | 105.1 |

Table S5*.* Potential energy differences (kJ/mol per glucosyl unit) of cellulose II between pattern A and pattern B (B - A) and their major components

|  | ΔEpot | ΔE coul SR | ΔE coul-1-4,5 | ΔE coul-rec | ΔEDih | ΔElocal  (ΔEDih+ΔEcoul-1-4,5) | ΔEcoul | ΔEtotal |
| --- | --- | --- | --- | --- | --- | --- | --- | --- |
| GROMOSa | -5.7 | 7.6 | -16.6 | 8.0 | 4.87 | -11.73 | -1.0 | -3.30 |
| CHARMMb | -12.8 | -6.4 | -4.2 | 2.8 | -3.62 | -7.82 | -7.80 | -1.50 |
| Glycam06b | -17.2 | -2.8 | -21.1 | 7.5 | 4.59 | -16.51 | -16.40 | 0.10 |
| OPLSa | -9.0 | -6.4 | -4.6 | 4.1 | -14.18 | -18.78 | -6.90 | 1.50 |
| DFT(PBE-D) | -8.14 |  |  |  |  |  |  |  |

Table S6.Potential energy differences (kJ/mol per glucosyl unit) of cellulose IIII between pattern A and pattern B (B - A) and their major components

|  | ΔEpot | ΔE coul-SR | ΔE coul-1-4,5 | ΔE coul-rec | ΔEDih | ΔElocal  (ΔEDih +ΔE coul-1-4,5) | ΔEcoul | ΔEtotal |
| --- | --- | --- | --- | --- | --- | --- | --- | --- |
| GROMOS_EMa | -0.3 | 9.2 | -17.7 | 10.2 | 2.03 | -15.67 | 1.7 | -4.6 |
| CHARMM_EMa | -10.7 | -6.8 | -3.5 | 0.6 | -1.74 | -5.24 | -9.7 | 2.2 |
| GLYCAM_EMa | -12.2 | 0.7 | -21.6 | 7.7 | 1.91 | -19.69 | -13.2 | 3.7 |
| OPLS_EMa | -13.8 | -3.5 | -7.6 | 5.1 | -7.31 | -14.91 | -6.0 | -4.7 |
| CHARMM_MDb | -8.4 | 8.7 | -15.5 | 6.0 |  |  | -0.7 | -9.4 |
| OPLS_MDb | -4.6 | 10.8 | -11.4 | 10.5 |  |  | 9.9 | -10.1 |
| DFT(PBE-D) | -2.95 |  |  |  |  |  |  |  |
